# Supplementary figures and images for: Copper–halide bonds as magnetic tunnels; structural, magnetic and theoretical studies of trans-bis(2,5-dibromopyridine)dihalo copper(ii) and trans-bis(2-bromopyridine)dibromo copper(ii)
Source: Royal Society of Chemistry journal article supplement (doi:10.1039/c2ce26211h), 2012-10-04

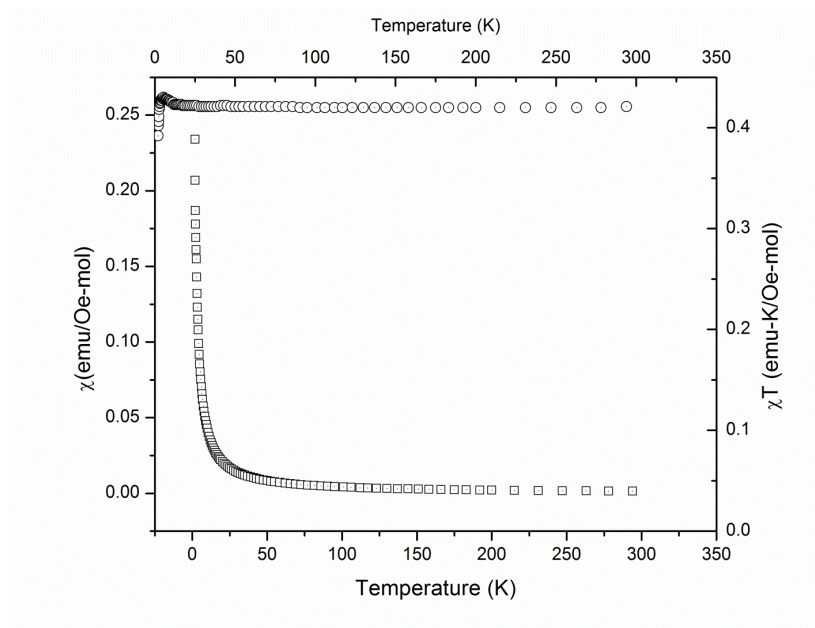

**Figure 1S.** Magnetic susceptibility ( $\square$ ) and  $\chi T$  ( $\circ$ ) of  $\text{Cu}(\text{2bp})_2\text{Br}_2$

Supplement: c2ce26211h.pdf [file c2ce26211h.pdf]
